# Supplementary material for: Enrichment of colorectal cancer associations in functional regions: Insight for using epigenomics data in the analysis of whole genome sequence-imputed GWAS data
Source: PubMed Central journal article supplement (PMC5697874; doi:10.1371/journal.pone.0186518), 2017-11-21

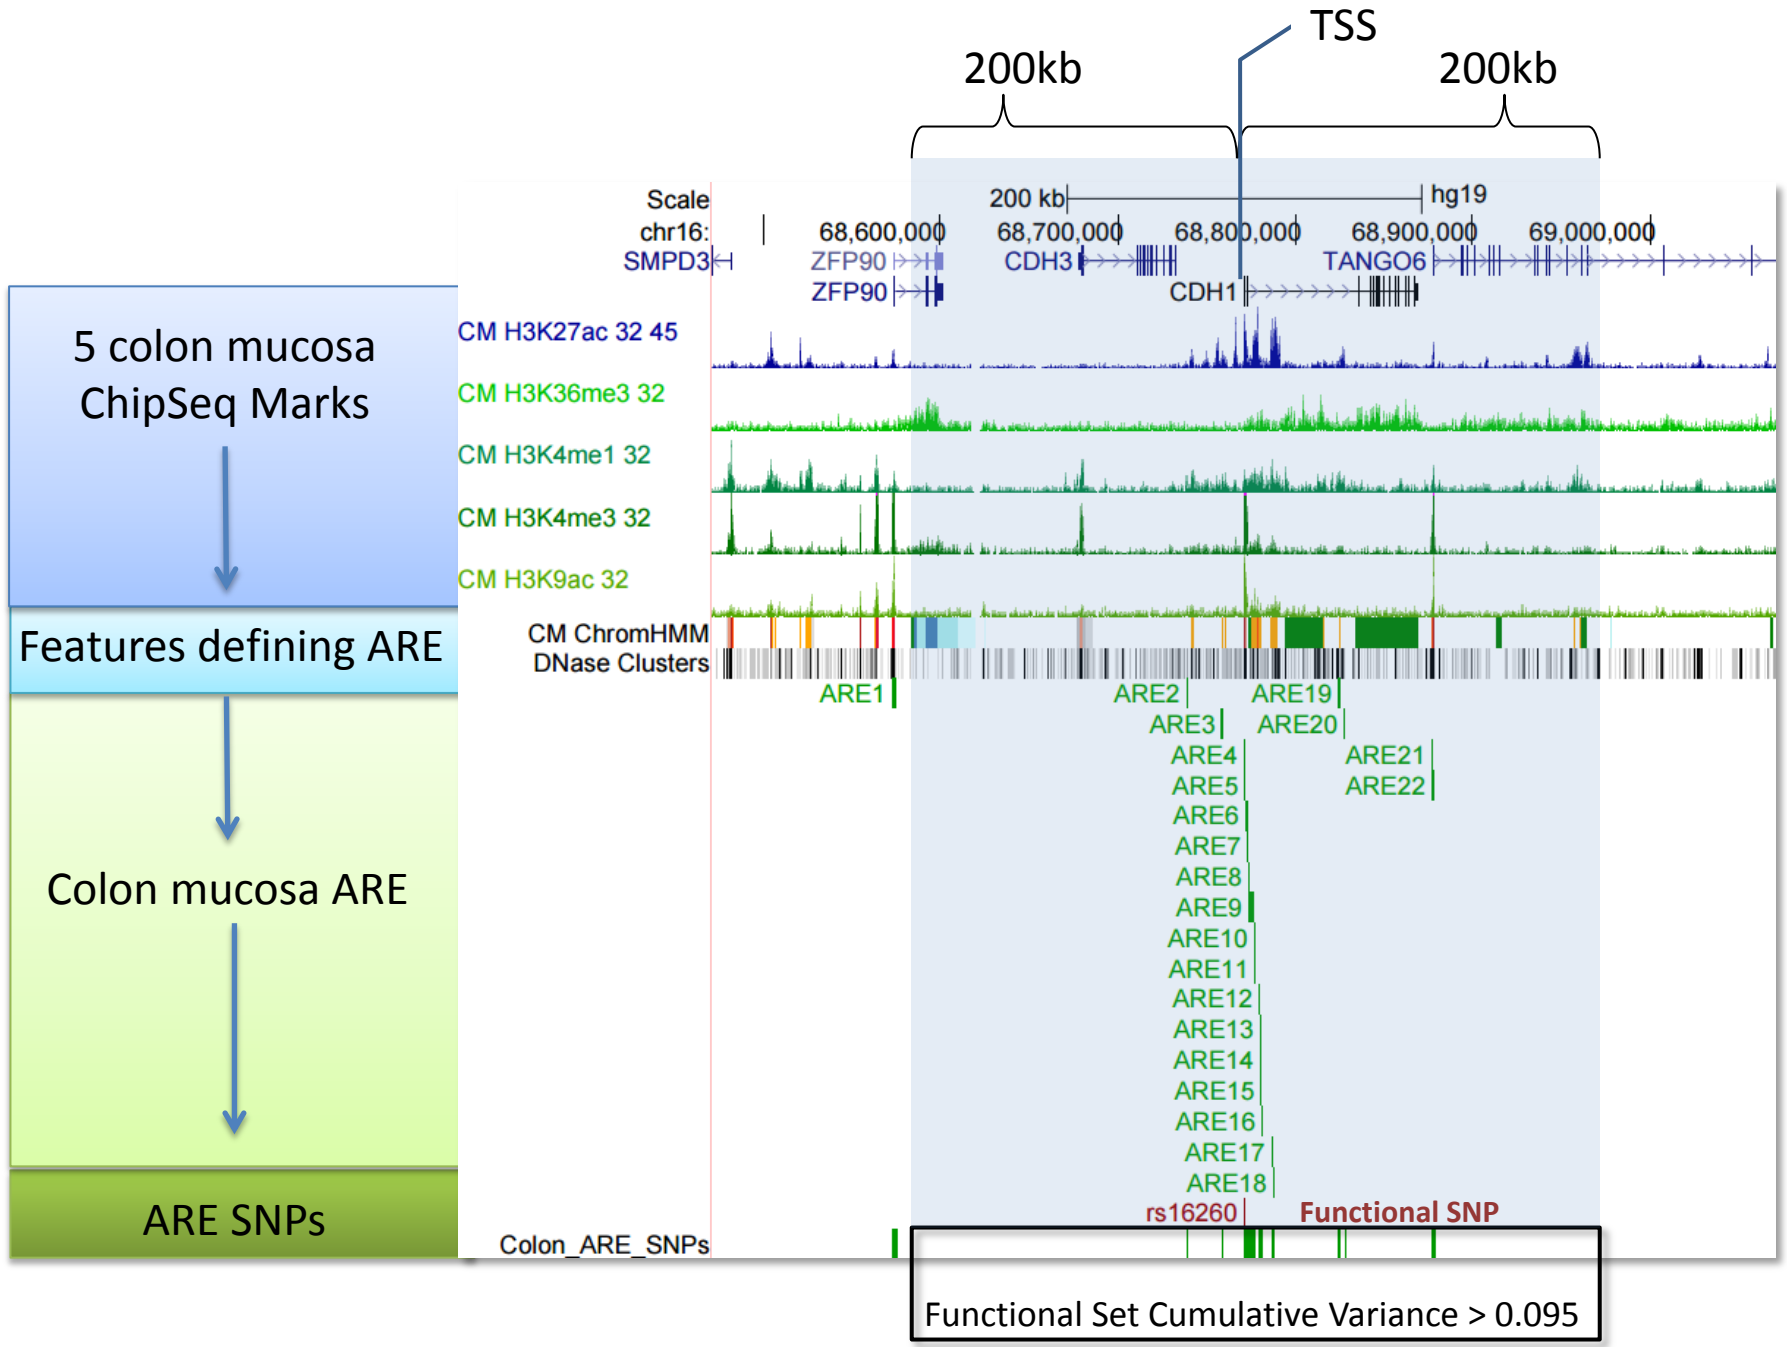

Supplement: pone.0186518.s003.pdf [file pone.0186518.s003.pdf]
